# Supplementary material for: Synthetization and characterization of SnCaAl2O3 nanocomposite and using as a superior adsorbent for Pb, Zn, and Cd ions in polluted water
Source: PLoS One. 2022 Nov 3;17(11):e0276888. doi: 10.1371/journal.pone.0276888 (PMC9632833; doi:10.1371/journal.pone.0276888)
Supplement: S3 Fig — (DOCX) [file pone.0276888.s003.docx]

**Supplementary (S3)**

**Synthetization and Characterization of SnCaAl2O3 Nanocomposite as a Superior Adsorbent for Pb, Zn, and Cd Ions in Polluted Water**

Ali Sayqal1, Moustafa Gamal Snousy2, Mahmoud F. Mubarak3, Ahmed H. Ragab4, Atef Mohamed Gad Mohamed5*, and Abeer El Shahawy 6*

1 Department of Chemistry, Faculty of Applied Science, Umm-Al-Qura University, Makkah, Saudi- Arabia; [aasayqal@uqu.edu.sa](mailto:aasayqal@uqu.edu.sa)

2 Egyptian Petroleum Sector, Petrotrade Co., Cairo P.O. Box 11371, Egypt; [moustafa_gamal93@yahoo.com](mailto:moustafa_gamal93@yahoo.com)

3 Petroleum Applications Department, Egyptian Petroleum Research Institute (EPRI), Cairo P.O. Box 11727, Egypt; [fathy8753@epri.sci.eg](mailto:fathy8753@epri.sci.eg)

4 Department of Chemistry, Faculty of Science, King Khalid University, Abha 62224, Saudi Arabia; [ahrejab@kku.edu.sa](mailto:ahrejab@kku.edu.sa)

5* Assiut & New Valley Company for Water and Wastewater, Assiut P.O. Box 71516, Egypt; [atefgad98@yahoo.com](mailto:atefgad98@yahoo.com)

6* Department of Civil Engineering, Faculty of Engineering, Suez Canal University, Ismailia P.O. Box 41522, Egypt; [abeer_shahawi@eng.suez.edu.eg](mailto:abeer_shahawi@eng.suez.edu.eg)

*****Correspondence: [abeer_shahawi@eng.suez.edu.eg](mailto:abeer_shahawi@eng.suez.edu.eg),

[atefgad98@yahoo.com](mailto:atefgad98@yahoo.com)

|  |
| --- |
| (a) |
|  |
| (b) |
|  |
| (**c**) |

**Figure** S3**.** The linear plot lnKc versus 1/T for (a) Zn+2, (b) Pb+2, and (c) Cd+2 adsorption on the SnCaAl2O3 nanoparticles.
